# Supplementary material
Source: publisher site journal article supplement (https://www.dovepress.com/article/446487)
Supplement: Supplementary file 1 [file get_supplementary_file.php]

**Figure S1: Questionnaire**

- **Date: / / Time: …...:…..**
- **Surveyor name: ……………. Sig:………………**
- **Serial Number:**
- **Group:**
- **Intervention Control**
- **Area:**

**Khartoum Umbadah**

**Bahri Karry**

**STATE Section (1): Socio-demographic characteristics**

**Age: ………**

**Sex:**  a- Boy ( ) b- Girl ( )

**Father's work:**  a- Employee ( ) b- Unemployed ( ) c- retired ( )

**Mother's work:**  a- Housewife ( ) b- Employee ( )

c- Unemployed ( ) d- retired ( )

**Father's education:**  a- Illiterate ( ) b-Primary ( )

c- Secondary ( ) d- Graduated ( ) e- Khalwa ( )

**Mother's education:**  a- Illiterate ( b-Primary ( )

c- Secondary ( ) d- Graduated ( ) e- Khalwa ( )

**Section (2): Knowledge of oral and dental health:**

1. **How many milk teeth do human have?**
2. 20 milk teeth ( )
3. 32 milk teeth ( )
4. Don’t know ( )
5. **How many permanent teeth do human have?**
6. 20 permanent teeth. ( )
7. 32 permanent teeth ( )
8. Don’t know ( )
9. **What is the Function of teeth?**
10. Help in chewing ( ) c- Help in speech ( )
11. Improve smiles ( ) d- Don’t know ( )
12. **What is the causes of Dental caries?**
13. Bug ( ) b- Improper brushing ( ) c-Sweets ( )

d- Occur by itself ( ) e- Don’t know ( )

1. **What is the effect of Sweets on dental health?**
2. dental plaque ( )
3. tooth decay ( )
4. tooth loss ( )
5. Don’t know ( )
6. **Which foods harm our teeth? (there may be more than one choice)**

a) Chocolate milk

b) honey

c) Sweets

d) Juice

e) Fruits

f) Carrots

g) Fresh juice

h)Don’t know ( )

1. **What is the effects of Smoking on dental health?**
2. stained teeth ( )
3. bad breath ( )
4. tooth loss ( )
5. gum disease ( )
6. increased risk of oral cancer ( )
7. Don’t know ( )
8. **Why Fluoride added to toothpaste?**
9. Improve taste ( ) b- Makes teeth resistant to caries ( )
10. Mouth freshener ( ) d- Don’t know ( )
11. **Plaque means?**
12. Food debris ( ) b- Soft deposits ( )
13. Hard deposits ( ) d-Staining on teeth ( )
14. e-Don’t know ( )
15. **What are Complications of Oral and Dental diseases?**

a- Teeth decay ( ) b- Teeth loss ( ) c- Chronic pain ( ) d- Oral cancer ( )

1. **What are prevention ways of Tooth decay?**

a- Maintain oral hygiene everyday ( )

b- Avoid unhealthy food and drinks ( )

c- Avoid harmful habits like smoking and tobacco use ( )

**Section (3):** **Oral and dental care practice**:

1. **Oral hygiene method used**?
2. Brushing ( ) c- Flossing ( )
3. miswak ( ) e- Mouth wash
4. **Frequency of tooth brushing?**
5. Occasionally ( ) c- Once daily ( )
6. Twice daily ( ) d- More than twice daily ( )
7. **Duration of brushing?**
8. Less than 1 min ( ) c- One min ( )
9. Two min ( ) d- More than 2 min ( ) e-Don’t know( )
10. **Toothpaste used?**
11. Fluoridated ( ) b- Non fluoridated ( ) e-Don’t know( )
12. **Type of toothbrush used?**
13. Hard bristle ( ) c- Soft bristle ( )
14. Medium bristle ( ) d- Electric toothbrush e- Don’t know ( )
15. **Toothbrush replaced after?**
16. One month ( ) b-Three month ( ) c-six month( ) d- Don’t know ( )
17. **How often do you rinse your Mouth?**
18. after every meal ( )
19. according to food type ( )
20. at bed time ( )
21. Don’t know ( )
22. **Do you clean your tongue?**
23. Always ( ) b- Sometime ( ) c- Don’t know ( )
24. **Frequency of dental visit?**
25. Regularly after 6-12 months ( ) c- Occasionally( )
26. Only in case of toothache ( ) d- Never visited the dentist( )
27. **What is the reasons that make you visit the dentist?**
28. Cavities
29. Tooth pain
30. Tooth extraction
31. Gum bleeding
32. Don’t visit a dentist before
33. check-up
34. Don’t know
35. **Do you have artificial teeth?**
36. Yes ( ) b- No ( )
37. **Did you get orthodontic treatment?**
38. Yes ( ) b- No ( )
